# Supplementary material for: Translating recent results from the Cardiovascular Outcomes Trials into clinical practice: recommendations from the Central and Eastern European Diabetes Expert Group (CEEDEG)
Source: Springer Nature journal article supplement (doi:10.1186/s12933-017-0622-7), 2017-10-23
Supplement: MOESM1 [file 15159866]

# Cardiovascular Outcomes in Type 2 Diabetes – Updates to Treatment Approaches

## Page 2: Determine the need for EASD/ADA guideline updates

Q1. Following the publication of positive results for liraglutide in the LEADER trial and empagliflozin in the EMPA-REG OUTCOME trial, should current EASD/ADA guidelines be updated?

## Page 3: Please state how you believe EASD/ADA guidelines should be updated with regards to...

Q2. Patients with Type 2 Diabetes and established cardiovascular disease, at high risk of cardiovascular events\*\*1 or more of: • history of myocardial infarction (MI)• evidence of multi-vessel coronary artery disease (CAD, significant stenosis or previous revascularisation)• evidence of single-vessel CAD plus positive non-invasive stress test for ischaemia or hospital discharge for unstable angina in past 12 months• unstable angina with presence of single- or multi-vessel CAD• history of stroke• occlusive peripheral artery disease

|                                     | Recommendation | Supporting comments |
|-------------------------------------|----------------|---------------------|
| Assessment                          | -              | -                   |
| Diagnosis                           | -              | -                   |
| Management                          |                | -                   |
| Monitoring                          | -              | -                   |
| Evaluation of response to treatment | -              | -                   |
| Other                               | -              | -                   |

## Page 4: Please state how you believe EASD/ADA guidelines should be updated with regards to...

Q3. Patients with Type 2 Diabetes and no established cardiovascular disease

|                                     | Recommendation | Supporting comments |
|-------------------------------------|----------------|---------------------|
| Assessment                          |                | -                   |
| Diagnosis                           | -              | -                   |
| Management                          |                | -                   |
| Monitoring                          | -              | -                   |
| Evaluation of response to treatment | -              | -                   |
| Other                               | -              | -                   |

**Page 5: Please state how you believe EASD/ADA guidelines should be updated with regards to...**

Q4. Patients with Type 2 Diabetes and established renal disease\* \*eGFR (MDRD) <60 mL/min/1.73 m<sup>2</sup> and/or macroalbuminuria (urine albumin-to-creatinine ratio >300 mg/g

*No Response*

**Page 6: Please state how you believe EASD/ADA guidelines should be updated with regards to...**

Q5. Patients with Type 2 Diabetes and established renal\* and cardiovascular disease\*\*\*eGFR (MDRD) 300 mg/g\*\*1 or more of: • history of myocardial infarction (MI)• evidence of multi-vessel coronary artery disease (CAD, significant stenosis or previous revascularisation)• evidence of single-vessel CAD plus positive non-invasive stress test for ischaemia or hospital discharge for unstable angina in past 12 months• unstable angina with presence of single- or multi-vessel CAD• history of stroke• occlusive peripheral artery disease

|                                            | Recommendation | Supporting comments |
|--------------------------------------------|----------------|---------------------|
| <b>Assessment</b>                          | -              | -                   |
| <b>Diagnosis</b>                           | -              | -                   |
| <b>Management</b>                          |                | -                   |
| <b>Monitoring</b>                          | -              | -                   |
| <b>Evaluation of response to treatment</b> | -              | -                   |
| <b>Other</b>                               | -              | -                   |

**Page 7: Inter-professional, multidisciplinary team-based care**

Q6. Please indicate how to improve long-term adherence rates and self-management in patients with Type 2 Diabetes and either cardiovascular or renal comorbidity.

*No Response*

Q7. Please indicate (and develop on how these integrate if needed) which specialties should be included to develop inter-professional, multidisciplinary team-based care for a comprehensive multifactorial risk-reduction strategy in the context of cardiovascular comorbidity.

**Diabetologist/Endocrinologist**

**Internist**

**Nephrologist**

-

**Nutritionist/Dietician**

-

Q7. Please indicate (and develop on how these integrate if needed) which specialties should be included to develop inter-professional, multidisciplinary team-based care for a comprehensive multifactorial risk-reduction strategy in the context of cardiovascular comorbidity.

**Pharmacist** -

**Nurses** -

**Certified diabetes educator (incl. smoking cessation)** -

Q8. Please indicate (and develop on how these integrate if needed) which specialties should be included to develop inter-professional, multidisciplinary team-based care for a comprehensive multifactorial risk-reduction strategy in the context of renal comorbidity.

*No Response*
